# Supplementary material for: Convergent eusocial evolution is based on a shared reproductive groundplan plus lineage-specific plastic genes
Source: PubMed Central journal article supplement (PMC6570765; doi:10.1038/s41467-019-10546-w), 2019-06-14
Supplement: 41467_2019_10546_MOESM3_ESM.pdf [file 41467_2019_10546_MOESM3_ESM.pdf]

## Reporting Summary

Nature Research wishes to improve the reproducibility of the work that we publish. This form provides structure for consistency and transparency in reporting. For further information on Nature Research policies, see [Authors & Referees](#) and the [Editorial Policy Checklist](#).

### Statistics

For all statistical analyses, confirm that the following items are present in the figure legend, table legend, main text, or Methods section.

n/a Confirmed

- The exact sample size ( $n$ ) for each experimental group/condition, given as a discrete number and unit of measurement
- A statement on whether measurements were taken from distinct samples or whether the same sample was measured repeatedly
- The statistical test(s) used AND whether they are one- or two-sided  
*Only common tests should be described solely by name; describe more complex techniques in the Methods section.*
- A description of all covariates tested
- A description of any assumptions or corrections, such as tests of normality and adjustment for multiple comparisons
- A full description of the statistical parameters including central tendency (e.g. means) or other basic estimates (e.g. regression coefficient) AND variation (e.g. standard deviation) or associated estimates of uncertainty (e.g. confidence intervals)
- For null hypothesis testing, the test statistic (e.g.  $F$ ,  $t$ ,  $r$ ) with confidence intervals, effect sizes, degrees of freedom and  $P$  value noted  
*Give  $P$  values as exact values whenever suitable.*
- For Bayesian analysis, information on the choice of priors and Markov chain Monte Carlo settings
- For hierarchical and complex designs, identification of the appropriate level for tests and full reporting of outcomes
- Estimates of effect sizes (e.g. Cohen's  $d$ , Pearson's  $r$ ), indicating how they were calculated

*Our web collection on [statistics for biologists](#) contains articles on many of the points above.*

### Software and code

Policy information about [availability of computer code](#)

Data collection

All source code will be available on github upon article publication

Data analysis

All source code will be available on github upon article publication

For manuscripts utilizing custom algorithms or software that are central to the research but not yet described in published literature, software must be made available to editors/reviewers. We strongly encourage code deposition in a community repository (e.g. GitHub). See the Nature Research [guidelines for submitting code & software](#) for further information.

### Data

Policy information about [availability of data](#)

All manuscripts must include a [data availability statement](#). This statement should provide the following information, where applicable:

- Accession codes, unique identifiers, or web links for publicly available datasets
- A list of figures that have associated raw data
- A description of any restrictions on data availability

Raw data is uploaded to SRA. Processed data will be available on Github.

### Field-specific reporting

Please select the one below that is the best fit for your research. If you are not sure, read the appropriate sections before making your selection.

- Life sciences       Behavioural & social sciences       Ecological, evolutionary & environmental sciences

For a reference copy of the document with all sections, see [nature.com/documents/nr-reporting-summary-flat.pdf](http://nature.com/documents/nr-reporting-summary-flat.pdf)

# Ecological, evolutionary & environmental sciences study design

All studies must disclose on these points even when the disclosure is negative.

|                                   |                                                                                                                                                                                                                                                                                                                                          |
|-----------------------------------|------------------------------------------------------------------------------------------------------------------------------------------------------------------------------------------------------------------------------------------------------------------------------------------------------------------------------------------|
| Study description                 | We sampled individuals across caste development and across three adult tissues in pharaoh ants and honey bees (N = 177 RNA-seq samples total). We identified genes commonly associated with caste, and found that genes frequently associated with caste tended to be evolutionarily young, plastically expressed, and rapidly evolving. |
| Research sample                   | Pools of individuals across caste development in <i>Apis mellifera</i> and <i>Monomorium pharaonis</i> . Includes queen- and worker-destined larvae as well as queen, male, and worker pupae.                                                                                                                                            |
| Sampling strategy                 | We collected three replicates for each caste/stage/tissue combination. This number was chosen to enable rigorous differential expression analysis within cost constraints.                                                                                                                                                               |
| Data collection                   | MRW and MJH collected individuals and LQ performed all RNA extractions and sequencing.                                                                                                                                                                                                                                                   |
| Timing and spatial scale          | All samples were collected from laboratory colonies in summer 2016.                                                                                                                                                                                                                                                                      |
| Data exclusions                   | Lowly expressed genes (TPM < 1 in all sample types) were excluded from analysis.                                                                                                                                                                                                                                                         |
| Reproducibility                   | No replicate experiments were performed.                                                                                                                                                                                                                                                                                                 |
| Randomization                     | Organisms were not randomized, but sampled from separate replicate colonies.                                                                                                                                                                                                                                                             |
| Blinding                          | Blinding was not relevant as behavior was not assessed other than to collect worker nurses and foragers.                                                                                                                                                                                                                                 |
| Did the study involve field work? | <input type="checkbox"/> Yes <input checked="" type="checkbox"/> No                                                                                                                                                                                                                                                                      |

## Reporting for specific materials, systems and methods

We require information from authors about some types of materials, experimental systems and methods used in many studies. Here, indicate whether each material, system or method listed is relevant to your study. If you are not sure if a list item applies to your research, read the appropriate section before selecting a response.

### Materials & experimental systems

### Methods

|                                     |                                                                 |
|-------------------------------------|-----------------------------------------------------------------|
| n/a                                 | Involvement in the study                                        |
| <input checked="" type="checkbox"/> | <input type="checkbox"/> Antibodies                             |
| <input checked="" type="checkbox"/> | <input type="checkbox"/> Eukaryotic cell lines                  |
| <input checked="" type="checkbox"/> | <input type="checkbox"/> Palaeontology                          |
| <input type="checkbox"/>            | <input checked="" type="checkbox"/> Animals and other organisms |
| <input checked="" type="checkbox"/> | <input type="checkbox"/> Human research participants            |
| <input checked="" type="checkbox"/> | <input type="checkbox"/> Clinical data                          |

|                                     |                                                 |
|-------------------------------------|-------------------------------------------------|
| n/a                                 | Involvement in the study                        |
| <input checked="" type="checkbox"/> | <input type="checkbox"/> ChIP-seq               |
| <input checked="" type="checkbox"/> | <input type="checkbox"/> Flow cytometry         |
| <input checked="" type="checkbox"/> | <input type="checkbox"/> MRI-based neuroimaging |

## Animals and other organisms

Policy information about [studies involving animals](#); [ARRIVE guidelines](#) recommended for reporting animal research

|                         |                                                                   |
|-------------------------|-------------------------------------------------------------------|
| Laboratory animals      | Monomorium pharaonis and Apis mellifera, various strains          |
| Wild animals            | study did not involve wild animals                                |
| Field-collected samples | study did not involve field-collected samples                     |
| Ethics oversight        | No ethical approval was required as studied solely invertebrates. |

Note that full information on the approval of the study protocol must also be provided in the manuscript.
